# Supplementary material
Source: PubMed Central journal article supplement (PMC9652099)
Supplement: mmc1.pdf [file mmc1.pdf]

1 Large-Scale Bioaerosol Efficacy Evaluation  
2 of In-Duct Bipolar Ionization and  
3 Photocatalytic Devices

4 Supporting Information

5  
6 Supplementary Figures

7 **Figure S 1.** Photos from inside the test chamber. A) Facing towards the air return. B) Facing opposite  
8 direction of panel A (ZipWall not present). C) Technology installation section of HVAC system..... 2

9 **Figure S 2.** Representative ion concentration graphs from A) control test and B) bipolar ionization (BPI)  
10 device test. Yellow lines bound duration of test activity noted between the lines (sampling periods are  
11 all 10 minutes but appear shorter for the BPI device test vs. the control because the recording period of  
12 the ion data for the BPI test was longer in order to capture ion readings during the 90-minute device  
13 warm-up period). The peak in detected “ions” during nebulization is a result of charged particles being  
14 released in the process of MS2 aerosolization. .... 3

15 **Figure S 3.** Averaged results and first-order loss rate constant estimates for MS2 from control, A) bipolar  
16 ionization device experiments, and B) photocatalytic device experiments, calculated following Stephens  
17 et al. (2022) Interpreting Air Cleaner Performance Data in ASHRAE Journal 64(3):20-30. .... 4

18 **Figure S 4.** SMPS normalized particle concentration (where  $dN$  represents the number of particles in  
19 each SMPS size bin, and  $d\log D_p$  is the difference in the log of the channel width) at the beginning of the  
20 sampling periods noted in the legend for representative control and bipolar ionization (BPI) experiments  
21 for a representative (left) control test and (right) BPI test..... 5

22  
23 Supplementary Tables

24 **Table S 1.** Results from formal normality check on MS2 concentrations from bioaerosol samples using  
25 the Shapiro-Wilk test. .... 6

26 **Table S 2.** Ozone concentration measured during photocatalytic device experiments (reported in ppm). 6

27 **Table S 3.** Results from formal normality check on MS2 deposition coupon data using the Shapiro-Wilk  
28 test. Results are reported for each coupon location or pooled over all locations (as noted). .... 7

29 **Table S 4.** Results from paired Welch’s t-test for the deposition coupons comparing the deposition  
30 coupons from each coupon location or pooled over all locations (as noted). .... 7

31

32 Supplementary Figures

33

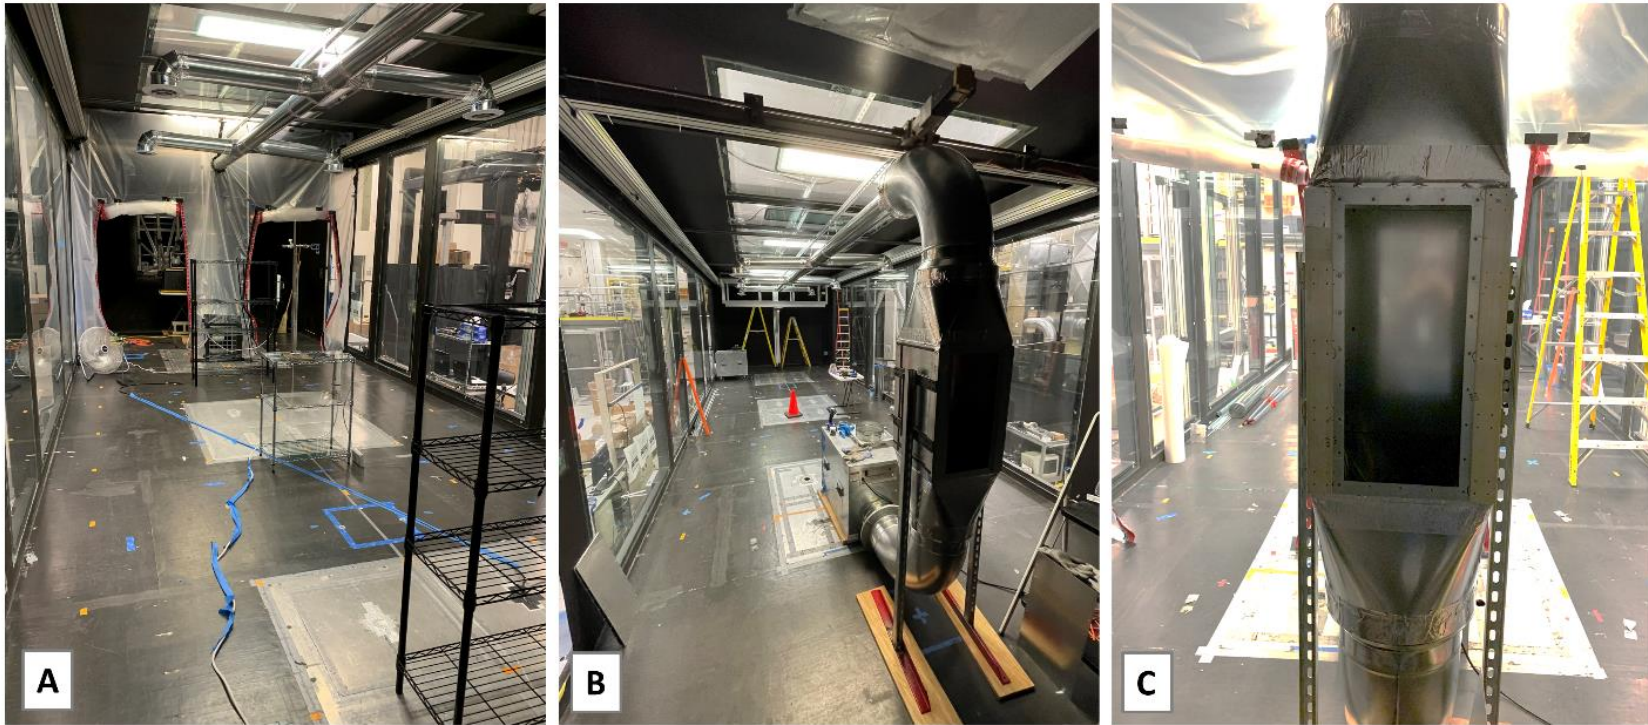

34

35 **Figure S 1.** Photos from inside the test chamber. A) Facing towards the air return. B) Facing opposite direction of panel A (ZipWall not present).  
36 C) Technology installation section of HVAC system.

37

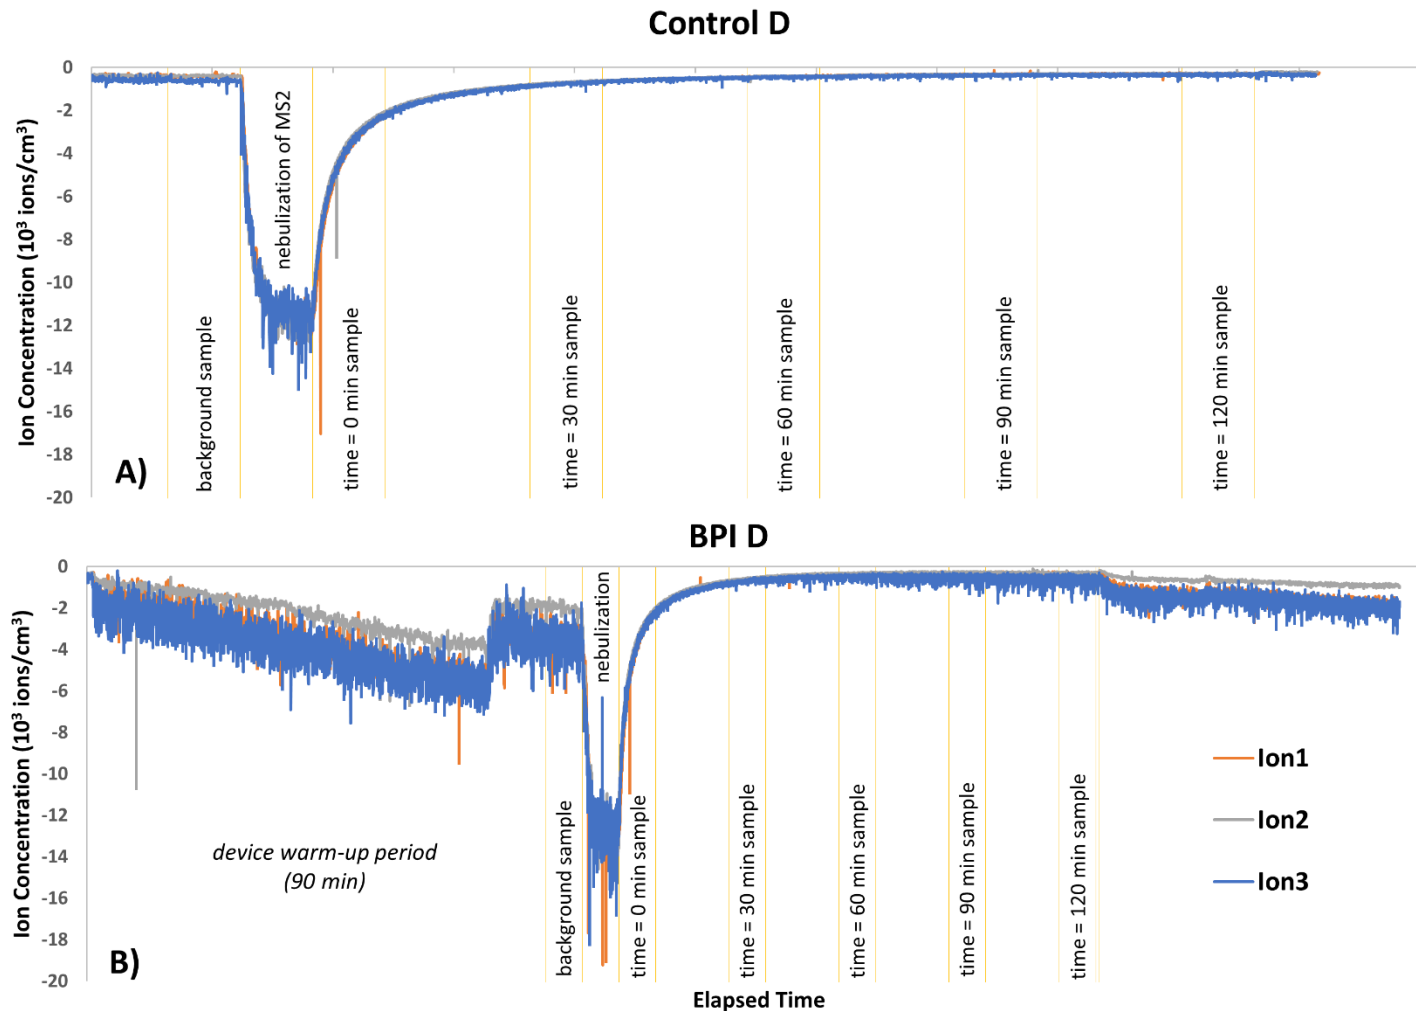

38

39 **Figure S 2.** Representative ion concentration graphs from A) control test and B) bipolar ionization (BPI) device test. Yellow lines bound duration  
 40 of test activity noted between the lines (sampling periods are all 10 minutes but appear shorter for the BPI device test vs. the control because  
 41 the recording period of the ion data for the BPI test was longer in order to capture ion readings during the 90-minute device warm-up period).  
 42 The peak in detected “ions” during nebulization is a result of charged particles being released in the process of MS2 aerosolization.

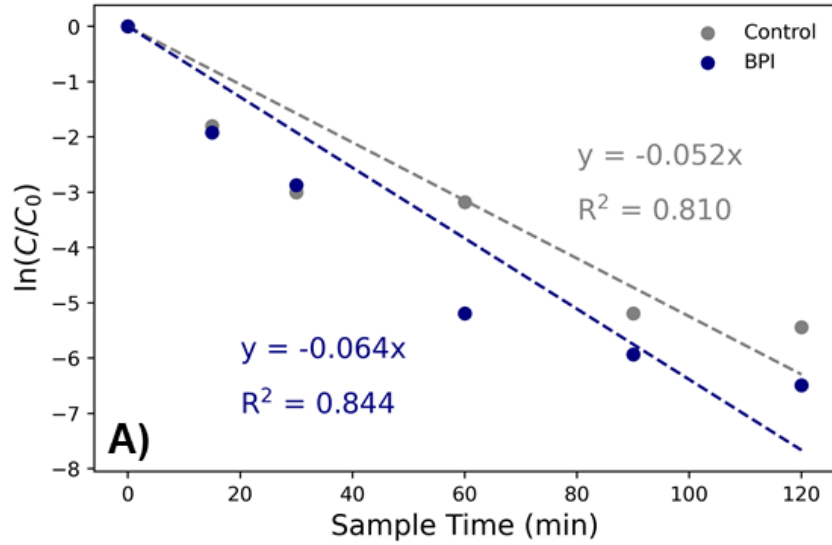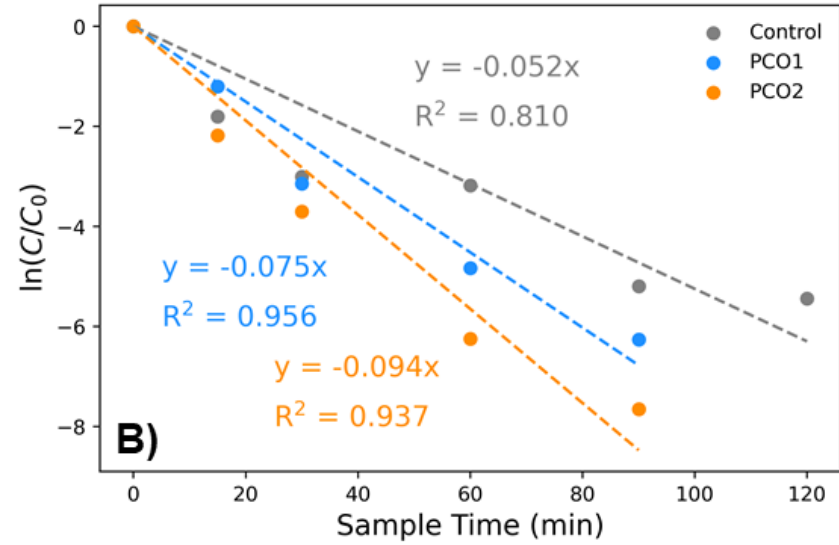

43

44 **Figure S 3.** Averaged results and first-order loss rate constant estimates for MS2 from control, A) bipolar ionization device experiments, and B)  
 45 photocatalytic device experiments, calculated following Stephens et al. (2022) *Interpreting Air Cleaner Performance Data* in ASHRAE Journal  
 46 64(3):20-30.

47

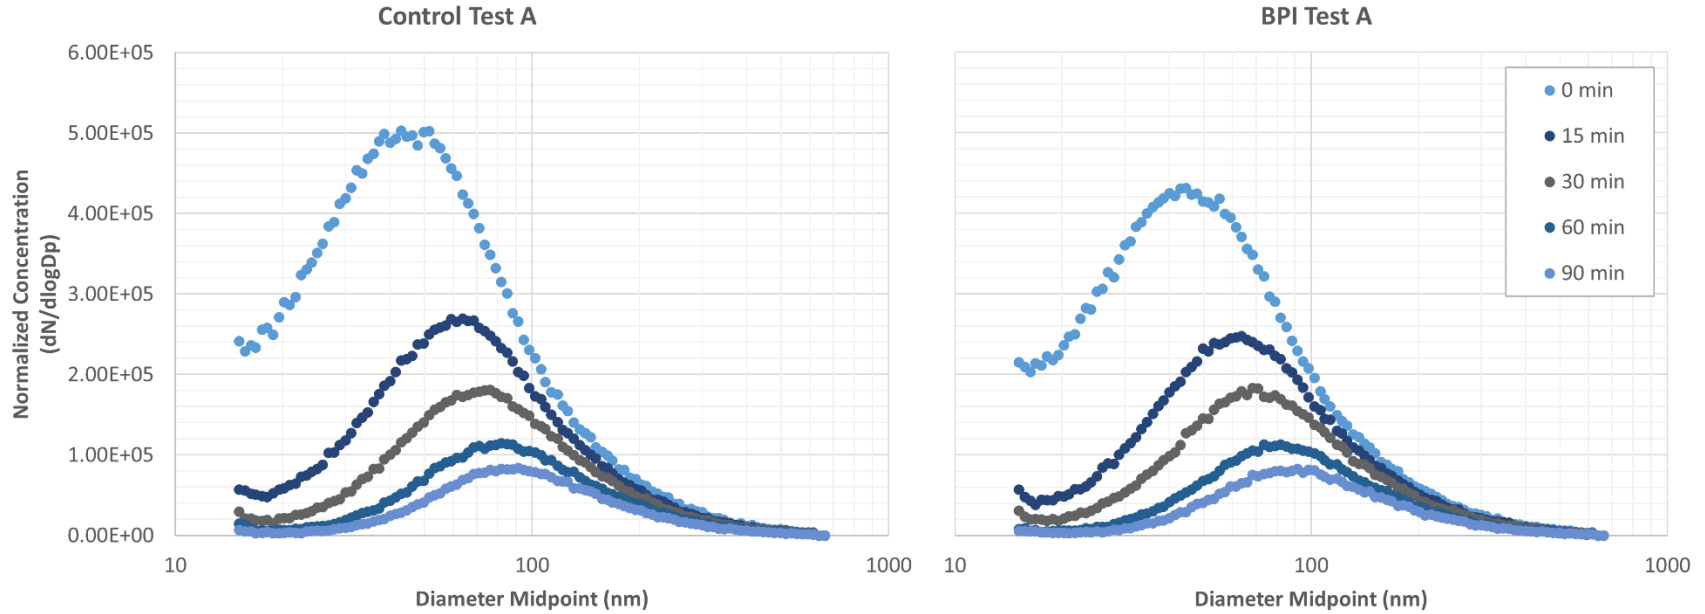

48

49 **Figure S 4.** SMPS normalized particle concentration (where dN represents the number of particles in each SMPS size bin, and dlogD<sub>p</sub> is the  
 50 difference in the log of the channel width) at the beginning of the sampling periods noted in the legend for representative control and bipolar  
 51 ionization (BPI) experiments for a representative (left) control test and (right) BPI test.

52 **Supplementary Tables**

53

54 **Table S 1.** Results from formal normality check on MS2 concentrations from bioaerosol samples using  
 55 the Shapiro-Wilk test.

| Test Type | Sample Time (min) | Test Statistic | p-value  |
|-----------|-------------------|----------------|----------|
| Control   | 15                | 0.838649       | 0.210546 |
|           | 30                | 0.935701       | 0.635729 |
|           | 60                | 0.98039        | 0.936693 |
|           | 90                | 0.99078        | 0.982355 |
| BPI       | 15                | 0.785645       | 0.08067  |
|           | 30                | 0.930593       | 0.600417 |
|           | 60                | 0.867873       | 0.257919 |
|           | 90                | 0.971619       | 0.885541 |
| PCO1      | 15                | 0.985533       | 0.769723 |
|           | 30                | 0.976933       | 0.708805 |
|           | 60                | 0.994124       | 0.85345  |
|           | 90                | 0.894622       | 0.368581 |
| PCO2      | 15                | 0.908785       | 0.414038 |
|           | 30                | 0.995178       | 0.867273 |
|           | 60                | 0.796954       | 0.107246 |
|           | 90                | 0.807635       | 0.132858 |

56

57 **Table S 2.** Ozone concentration measured during photocatalytic device experiments (reported in ppm).

| Test          | Control E | PCO1 A | PCO1 B | PCO1 C | PCO2 A | PCO2 B | PCO2 C |
|---------------|-----------|--------|--------|--------|--------|--------|--------|
| Background    | 0.016     | 0.013  | 0.024  | 0.025  | 0.011  | 0.012  | 0.014  |
| Nebulization  | 0.016     | 0.014  | 0.024  | 0.025  | 0.019  | 0.019  | 0.021  |
| Time = 0 min  | 0.007     | 0.009  | 0.015  | 0.018  | 0.024  | 0.027  | 0.028  |
| Time = 15 min | 0.007     | 0.012  | 0.020  | 0.024  | 0.047  | 0.051  | 0.051  |
| Time = 30 min | 0.009     | 0.017  | 0.024  | 0.027  | 0.069  | 0.072  | 0.073  |
| Time = 60 min | 0.010     | 0.020  | 0.029  | 0.032  | 0.102  | 0.107  | 0.107  |
| Time = 90 min | 0.009     | 0.026  | 0.033  | 0.034  | 0.127  | 0.133  | 0.134  |

58

59 **Table S 3.** Results from formal normality check on MS2 deposition coupon data using the Shapiro-Wilk  
 60 test. Results are reported for each coupon location or pooled over all locations (as noted).

| Test Type | Location | Test Statistic | p-value  |
|-----------|----------|----------------|----------|
| Control   | C1       | 0.852588       | 0.234651 |
|           | C2       | 0.849549       | 0.224704 |
|           | C3       | 0.9691         | 0.835905 |
|           | C4       | 0.945266       | 0.686678 |
|           | C5       | 0.948855       | 0.708974 |
| BPI       | C1       | 0.963933       | 0.635073 |
|           | C2       | 0.944803       | 0.547061 |
|           | C3       | 0.976692       | 0.707274 |
|           | C4       | 0.925802       | 0.47311  |
|           | C5       | 0.87333        | 0.305031 |
| Control   | all      | 0.963908       | 0.624506 |
| BPI       | all      | 0.955103       | 0.608041 |
| PCO1      | all      | 0.930213       | 0.597826 |

61

62 **Table S 4.** Results from paired Welch's t-test for the deposition coupons comparing the deposition  
 63 coupons from each coupon location or pooled over all locations (as noted).

| Test Type | Location | Test statistic | p-value  |
|-----------|----------|----------------|----------|
| BPI       | C1       | -1.41388       | 0.220767 |
|           | C2       | 0.832103       | 0.457438 |
|           | C3       | -0.75138       | 0.486367 |
|           | C4       | 0.543033       | 0.625769 |
|           | C5       | 0.666959       | 0.548213 |
|           | all      | 0.267958       | 0.790715 |
| PCO1      | all      | -0.61798       | 0.547535 |

64
